# Supplementary material
Source: Royal Society of Chemistry journal article supplement (doi:10.1039/d5ee07330h)
Supplement: d5ee07330h1.pdf [file d5ee07330h1.pdf]

## Supplementary Material for: Safeguarding drinking water in North-Western Europe by modelling the fate of amines from CO<sub>2</sub> capture

François Clayer<sup>1,2</sup>, Cathrine Brecke Gundersen<sup>1</sup>, Magnus Norling<sup>1</sup>, Luca Pozzoli<sup>3</sup>, Ashenafi Seifu Gragne<sup>1</sup>, Tore Flatlandsmo Berglen<sup>3</sup>

<sup>1</sup>Norwegian Institute for Water Research (NIVA), Økernveien 94, 0579 Oslo, Norway

<sup>2</sup>Norwegian Geotechnical Institute (NGI), Sandakerveien 140, 0484 Oslo, Norway

<sup>3</sup>NILU, Instituttveien 18, 2007 Kjeller, Norway

Corresponding author: Francois Clayer, [francois.clayer@ngi.no](mailto:francois.clayer@ngi.no)

This file contains:

Figures S1 to S3

Tables S1 and S2

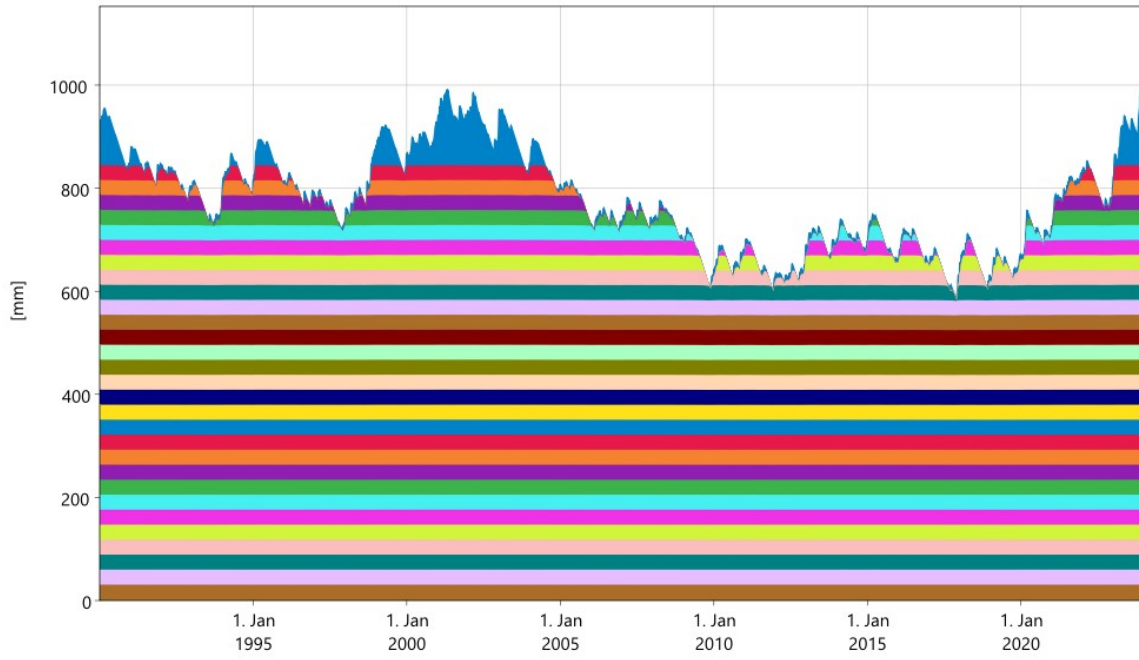

FigureS1: Modeled groundwater level in Sint Jansteen aquifer across the thirty layers.

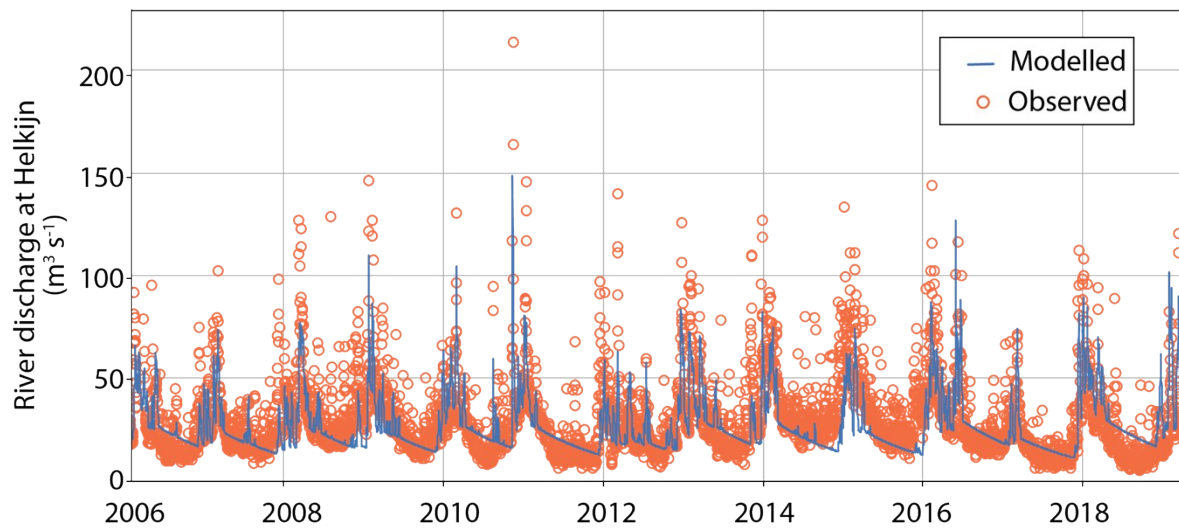

Figure S2: Comparison of modelled and observed river discharge in the Schelde River at Helkijn station.

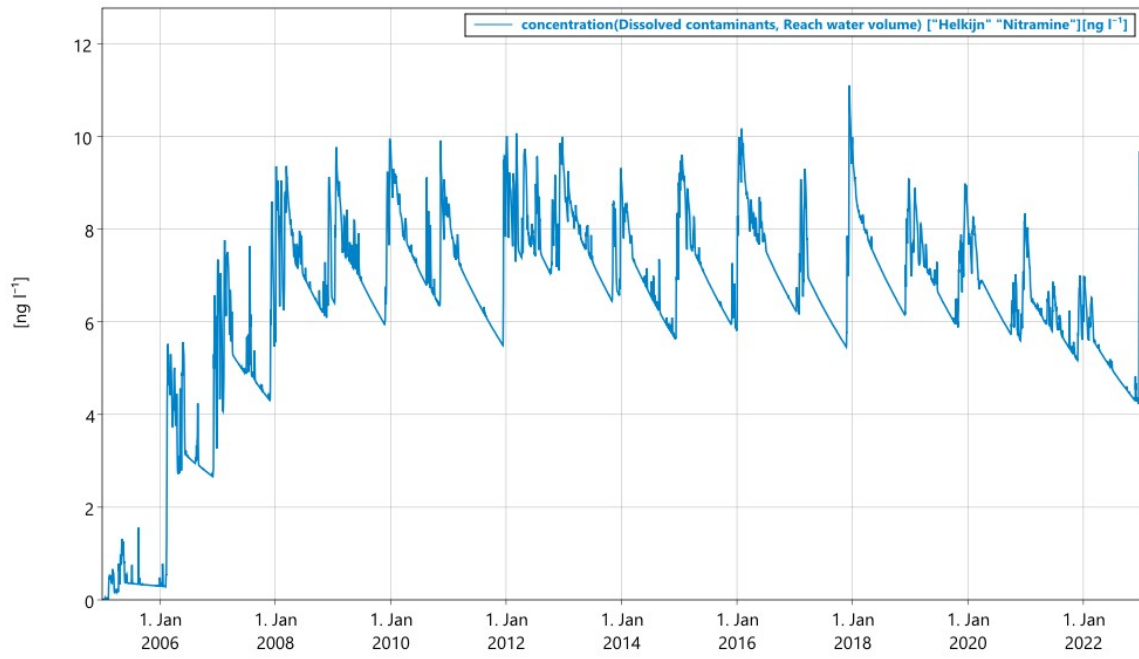

Figure S3: Modelled NA+NSA concentrations in the Schelde river (deposition rate: 8 ng m<sup>-2</sup> day<sup>-1</sup>, NA+NSA half-life: 2 yr)

Table S1: Surface and groundwater model parameters

| <b>NA and NSA physical properties</b>                | <b>Units</b>                          | <b>Value</b> |           |
|------------------------------------------------------|---------------------------------------|--------------|-----------|
|                                                      |                                       | <b>NSA</b>   | <b>NA</b> |
| Molar mass [1]                                       | g mol <sup>-1</sup>                   | 74.1         | 90.7      |
| Molecular volume [1]                                 | cm <sup>3</sup> mol <sup>-1</sup>     | 56.5         | 90.7      |
| Henry's constant at 25°C [1]                         | Pa m <sup>3</sup> mol <sup>-1</sup>   | 0.104        | 0.081     |
| Log10 Octanol-water partitioning coefficient [1]     | -                                     | -0.7         | -0.9      |
| <b>Surface water model parameters</b>                | <b>Units</b>                          | <b>Value</b> |           |
| Degree-day evapotranspiration [auto-calibrated]      | mm °C <sup>-1</sup> day <sup>-1</sup> | 0.18         |           |
| Baseflow index [auto-calibrated]                     | -                                     | 0.75         |           |
| Shallow soil water time constant [auto-calibrated]   | days                                  | 8            |           |
| Shallow soil field capacity [auto-calibrated]        | mm                                    | 290          |           |
| Deep soil temperature [fixed]                        | °C                                    | 8            |           |
| Deep soil time constant [auto-calibrated]            | days                                  | 400          |           |
| Shallow soil solid organic carbon [fixed]            | kg m <sup>-2</sup>                    | 30           |           |
| Deep soil solid organic carbon [fixed]               | kg m <sup>-2</sup>                    | 3            |           |
| Shallow soil dissolved organic carbon [fixed]        | mg L <sup>-1</sup>                    | 10           |           |
| Deep soil dissolved organic carbon [fixed]           | mg L <sup>-1</sup>                    | 10           |           |
| <b>Groundwater model parameters</b>                  | <b>Units</b>                          | <b>Value</b> |           |
| Baseflow index [fixed]                               | -                                     | 0.69         |           |
| Soil water time constant [fixed]                     | days                                  | 2            |           |
| Soil field capacity [fixed]                          | mm                                    | 120          |           |
| Groundwater temperature [fixed]                      | °C                                    | 8            |           |
| Groundwater travel time [resulting from calibration] | years                                 | 5 or 10      |           |
| Groundwater layer field capacity [calibrated]        | mm                                    | 29.2 or 58.3 |           |
| Degree-day evapotranspiration [fixed]                | mm °C <sup>-1</sup> day <sup>-1</sup> | 0.14         |           |
| Soil solid organic carbon [fixed]                    | kg m <sup>-2</sup>                    | 30           |           |
| Groundwater solid organic carbon [fixed]             | kg m <sup>-2</sup>                    | 3            |           |
| Soil dissolved organic carbon [fixed]                | mg L <sup>-1</sup>                    | 6            |           |
| Groundwater dissolved organic carbon [fixed]         | mg L <sup>-1</sup>                    | 3            |           |

Reference: [1] Brecke Gundersen et al. (2024)

Table S2: Calibration statistics for river water flow predictions in Schelde River.

| Statistics                | Daily                                |
|---------------------------|--------------------------------------|
| NSE                       | 0.50                                 |
| KGE                       | 0.65                                 |
| R <sup>2</sup>            | 0.51                                 |
| Spearman Rank Correlation | 0.55                                 |
| Bias                      | 0.86 m <sup>3</sup> s <sup>-1</sup>  |
| RMSE                      | 13.50 m <sup>3</sup> s <sup>-1</sup> |
| RSR                       | 0.71                                 |
| PBIAS                     | 3.0%                                 |

NSE: Nash-Sutcliffe efficiency; KGE: Kling-Gupta efficiency; RMSE: root mean squared error; RSR: RMSE-observations standard deviation ratio (Moriassi et al. 2007); PBIAS: Percent bias (Moriassi et al. 2007).

### **References:**

- Gundersen, C. B., Norling, M. D., & Gragne, A. S. (2024). Modelling future levels of nitrosamines and nitramines in a groundwater compartment close to a CO<sub>2</sub> capture facility. In 27. Norsk institutt for vannforskning. <https://niva.brage.unit.no/niva-xmlui/handle/11250/3160694>
- Moriassi, D., Arnold, J., Van Liew, M., Bingner, R., Harmel, R. D., & Veith, T. (2007). Model Evaluation Guidelines for Systematic Quantification of Accuracy in Watershed Simulations. *Transactions of the ASABE*, 50. <https://doi.org/10.13031/2013.23153>
